# Supplementary material
Source: PubMed Central journal article supplement (PMC8256102)
Supplement: supplemental_table_s1_03152021_ioab062.pdf [file supplemental_table_s1_03152021_ioab062.pdf]

**Table S1. Parameters of Bowtie2/Bowtie1 based alignment**

| <b>Alignment method</b>             | <b>Reference anchoring preparation</b> | <b>Reads anchoring preparation</b> | <b>Alignment</b>                                  |
|-------------------------------------|----------------------------------------|------------------------------------|---------------------------------------------------|
| bt2 no anchor ref no padding        | No reference anchoring                 | No reads anchoring                 | bowtie2 --norc -N 1<br>-L 16 -i S,0,0.2 -f        |
| bt2 no anchor                       | -l NNNNNNNNNN<br>-r NNNNNNNNNN         | No reads anchoring                 | bowtie2 --norc -N 1<br>-L 16 -i S,0,0.2 -f        |
| bt2 no anchor --np 0                | -l NNNNNNNNNN<br>-r NNNNNNNNNN         | No reads anchoring                 | bowtie2 --norc -N 1<br>-L 16 -i S,0,0.2 -f --np 0 |
| bt1 no anchor                       | -l NNNNNNNNNN<br>-r NNNNNNNNNN         | No reads anchoring                 | bowtie --norc -v 2                                |
| bt2 CG anchor 6nt                   | -l CCCCCCCCCC<br>-r GGGGGGGGGG         | -l CCCCCC<br>-r GGGGGG             | bowtie2 --norc -N 1<br>-L 16 -i S,0,0.2 -f        |
| bt2 CG anchor 5nt<br>/bt2 CG anchor | -l CCCCCCCCCC<br>-r GGGGGGGGGG         | -l CCCCC<br>-r GGGGG               | bowtie2 --norc -N 1<br>-L 16 -i S,0,0.2 -f        |
| bt2 CG anchor 4nt                   | -l CCCCCCCCCC<br>-r GGGGGGGGGG         | -l CCCC<br>-r GGGG                 | bowtie2 --norc -N 1<br>-L 16 -i S,0,0.2 -f        |
| bt2 CG anchor 3nt                   | -l CCCCCCCCCC<br>-r GGGGGGGGGG         | -l CCC<br>-r GGG                   | bowtie2 --norc -N 1<br>-L 16 -i S,0,0.2 -f        |
| bt2 CG anchor 2nt                   | -l CCCCCCCCCC<br>-r GGGGGGGGGG         | -l CC<br>-r GG                     | bowtie2 --norc -N 1<br>-L 16 -i S,0,0.2 -f        |
| bt2 CG anchor 1nt                   | -l CCCCCCCCCC<br>-r GGGGGGGGGG         | -l C<br>-r G                       | bowtie2 --norc -N 1<br>-L 16 -i S,0,0.2 -f        |
| bt1 CG anchor 6nt                   | -l CCCCCCCCCC<br>-r GGGGGGGGGG         | -l CCCCCC<br>-r GGGGGG             | bowtie --norc -v 2                                |
| bt1 CG anchor 5nt<br>/bt1 CG anchor | -l CCCCCCCCCC<br>-r GGGGGGGGGG         | -l CCCCC<br>-r GGGGG               | bowtie --norc -v 2                                |
| bt1 CG anchor 4nt                   | -l CCCCCCCCCC<br>-r GGGGGGGGGG         | -l CCCC<br>-r GGGG                 | bowtie --norc -v 2                                |
| bt1 CG anchor 3nt                   | -l CCCCCCCCCC<br>-r GGGGGGGGGG         | -l CCC<br>-r GGG                   | bowtie --norc -v 2                                |
| bt1 CG anchor 2nt                   | -l CCCCCCCCCC<br>-r GGGGGGGGGG         | -l CC<br>-r GG                     | bowtie --norc -v 2                                |
| bt1 CG anchor 1nt                   | -l CCCCCCCCCC<br>-r GGGGGGGGGG         | -l C<br>-r G                       | bowtie --norc -v 2                                |

Summary of reads anchoring, reference anchoring and alignment parameters used in Bowtie2 (bt2) and Bowtie1 (bt1) based alignments. In the reads and reference anchoring section, -l/-r means anchor sequence to the 5'/3' of reads/reference fasta sequence. bowtie2-build or bowtie-build was used with default parameter to build bowtie2/bowtie1 index after reference anchoring preparation.
